# Supplementary material
Source: PubMed Central journal article supplement (PMC2764920)
Supplement: 0903693106_0903693106SI.pdf [file 0903693106_0903693106SI.pdf]

# Supporting Information

Zeng et al. 10.1073/pnas.0903693106

## SI Materials and Methods

**Gata6 DNA Injections.** Full-length Gata6 cDNA coding sequence was amplified with primers incorporating the attB1 or attB2 sites listed in Table 2, and recombined into pDON221 by a Gateway cloning BP reaction. This construct was then recombined into pDestTol2pA2 with either the cardiac myosin light chain 2 [CMLC2; (1)] or smooth muscle actin (SMA) promoter cloned in pDONRp4p1r, and the p3E-polyA 3'UTR in pDONRp2p3 by using a Gateway cloning LR reaction as described (2). One-cell zebrafish embryos were injected with 1 nL of 50 ng/ $\mu$ L transposon DNA combined with a 100 ng/ $\mu$ L transposase RNA.

The  $\alpha$ SMA promoter was cloned by fusing a putative enhancer from the first intron of the  $\alpha$ SMA gene upstream of the

promoter. Three hundred base pairs of promoter was cloned using primers SMap-f3-attb1r and SMap-r5, and a 2,165-bp intron fragment cloned using SMap-f4-attb4 and SMap-r4. The two fragments were fused by PCR and Gateway cloned into pDONRp4p1r.

```
SMap-f4attb4 TATAGAAAAGTTGgccacctagcttctctca
SMap-r4 tagcccatgacaacaatgtg
SMap-f3 cacattgtgtcatgggctatgagcgtctgttagcagatcag
SMap-r5-attb1r GTACAAACTTGgtgtacacctactggtttgtg
```

**miR-145 Target Identification.** Potential miR-145 targets were identified from miRBASE: <http://microrna.sanger.ac.uk>

1. Huang CJ, Tu CT, Hsiao CD, Hsieh FJ, Tsai HJ (2003) Germ-line transmission of a myocardium-specific GFP transgene reveals critical regulatory elements in the cardiac myosin light chain 2 promoter of zebrafish. *Dev Dyn* 228:30–40.

2. Kwan KM, et al. (2007) The Tol2kit: A multisite gateway-based construction kit for Tol2 transposon transgenesis constructs. *Dev Dyn* 236:3088–3099.

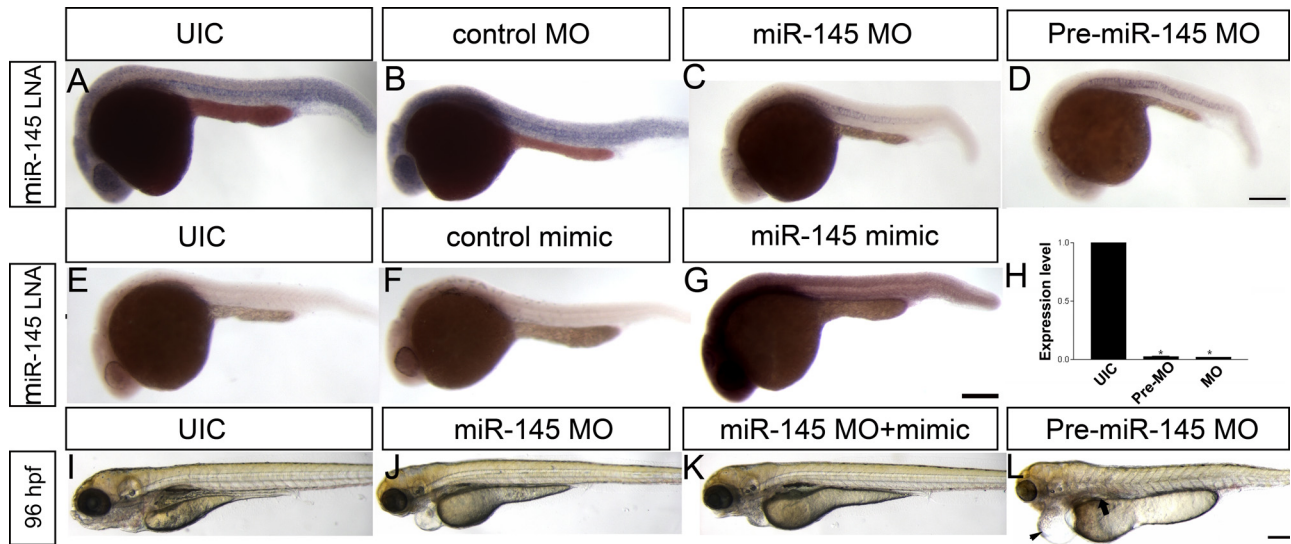

**Fig. S1.** Phenotype after injection of miR-145 morpholino and mimic. (A) LNA in situ hybridization shows ubiquitous expression of miR-145 in uninjected wild-type embryos (UIC) and (B) control MO-injected embryos. (C) miR-145 expression is significantly reduced by miR-145 MO and (D) pre-miR-145 morpholino. (E) Expression of miR-145 in uninjected or (F) control mimic expressing embryos is low in comparison to (G) miR-145 mimic-injected embryos. (H) qPCR indicates significant knocking down of miR-145 in 24 hpf embryos treated with mature miR-145 and pre-miR-145 morpholino. (I–K) Co-injection of miR-145 mimic with miR-145 morpholino can partially rescue the phenotype of miR-145 morphants. (L) pre-miR-145 MO induces a similar phenotype to miR-145 MO with gut morphological defects (arrow) and pericardial edema (arrowhead) in 96 hpf embryos. Bars, mean  $\pm$  SEM. \*,  $P < 0.05$ . (Scale bars, 200  $\mu$ m.)





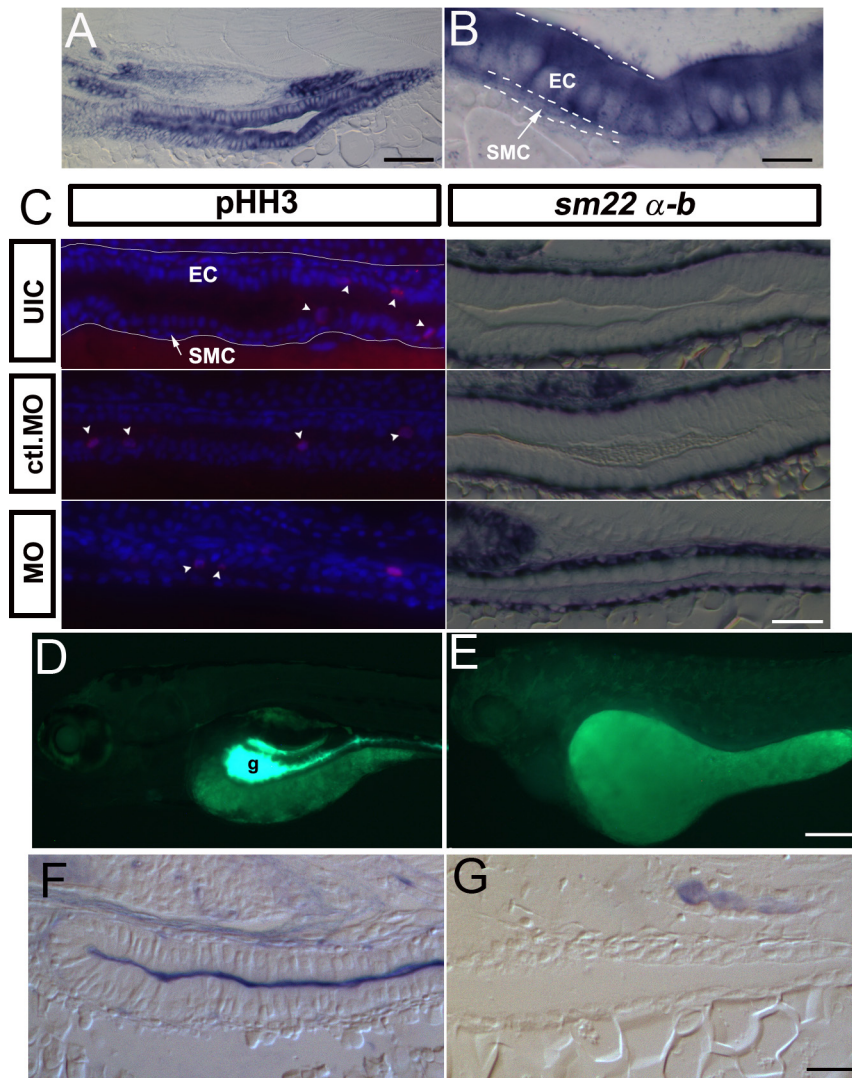

**Fig. S4.** Expression of *gata6* in the gut and characterization of differentiation defects in the miR-145 morphants. (A) A longitudinal section of a 96 hpf wild-type embryo shows strong expression of *gata6* in gut epithelial and smooth muscle cells. (B) Enlargement of (A) highlights staining of *gata6* in both layers. White dashed lines distinguish the smooth muscle cell layer and epithelial cell layer. (C) Longitudinal sections of phosphohistone H3 (pHH3) staining (red) in the 96 hpf gut. Nuclei were counterstained with DAPI (blue). No significant difference of pHH3 positive cells (white arrowheads) was found in the different experimental groups in either epithelial or smooth muscle layers. The white line in the uninjected embryo highlights the gut epithelium. In the second column, longitudinal sections of *sm22 $\alpha$ -b* in situ hybridization in 96 hpf embryos shows specific staining in the smooth muscle cell layer, and highlights abnormal morphology of both epithelial and smooth muscle cells in miR-145 morphants as compared to controls. (D and E) The wild-type gut (g) is strongly fluorescent at 120 hpf after DAF-2DA staining (Green) in comparison with miR-145 morphants. (F and G) Strong alkaline phosphatase activity is observed in the gut lumen of wild-type embryos but is absent in miR-145 morphants. SMC, smooth muscle cell (white arrow); EC, epithelial cell; ctrl. MO, control morpholino. (Scale bars, A: 50  $\mu$ m; B: 10  $\mu$ m; C and G; 25  $\mu$ m; D: 200  $\mu$ m.)



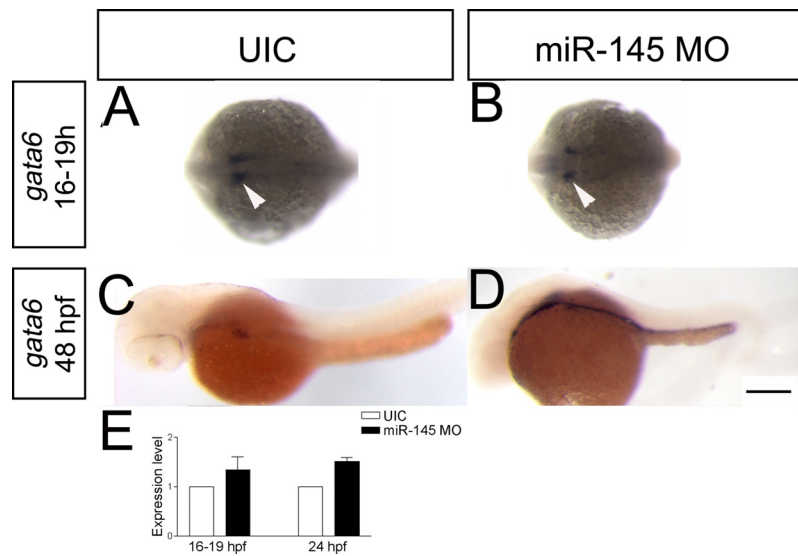

**Fig. S5.** *gata6* expression level are not modulated by miR-145 at early embryonic stages. (A and B) *gata6* expression levels (white arrowhead) are unchanged in myocardial precursors of uninjected wild-type embryos and miR-145 morphants at 16–19 hpf. (C and D) *gata6* expression is significantly increased in miR-145 morphants at 48 hpf. (Scale bars, 200  $\mu$ m.) (E) There is no significant change in *gata6* expression in miR-145 morphants at 16 hpf and 24 hpf by qPCR.



**Table S1. Morpholino and mimic sequences**

| MO name                      | MO Sequence                    | Dose                                                 | Ref.       |
|------------------------------|--------------------------------|------------------------------------------------------|------------|
| miR-145 MO                   | TTGCCCAAGGGATTCTGGGAAAAGTGGACC | 3 ng                                                 | This paper |
| miR-145 precursor MO         | AGTATTTCCAGGAATCCCCCTTCG       | 15 ng                                                | This paper |
| Mismatch miR-145 MO          | CCAAGAACAGTATTTCCAGGAATCC      | 3 ng                                                 | This paper |
| Control TP                   | TTGTCCAAACTCATCAATGTATCTT      | 0.4 ng for sensor test                               | This paper |
| GATA-6-TP <sup>miR-145</sup> | TCTTCCAGTTTCAGAACGATCAATC      | 15 ng for phenotype assay/0.4 ng for sensor test     | This paper |
| p53 MO                       | GCGCCATTGCTTTGCAAGAATTG        | 1.5 (wt/wt) folds along with other MOs               | 1          |
| GATA6 MO                     | AGCTGTTATCACCCAGGTCCATCCA      | 0.4 ng for rescue                                    | 2          |
| hsa-miR-145 miRIDIAN mimic   | GUCCAGUUUCCAGGAAUCCCU          | 3 ng for overexpression assay/0.3 ng for sensor test | This paper |
| Negative control mimic       | UCACAACCUCCUAGAAAGAGUAGA       | 3 ng for overexpression assay                        | This paper |

1. Robu ME, et al. (2007) p53 activation by knockdown technologies. *PLoS Genet* 3:e78.

2. Peterkin T, Gibson A, Patient R (2003) GATA-6 maintains BMP-4 and Nkx2 expression during cardiomyocyte precursor maturation. *EMBO J* 22:4260–4273.
